# Supplementary material
Source: PubMed Central journal article supplement (PMC4409786)
Supplement: NIHMS621411-supplement-2.pdf [file NIHMS621411-supplement-2.pdf]

Lucas, et al  
 SUPPLEMENTARY FIGURE S1

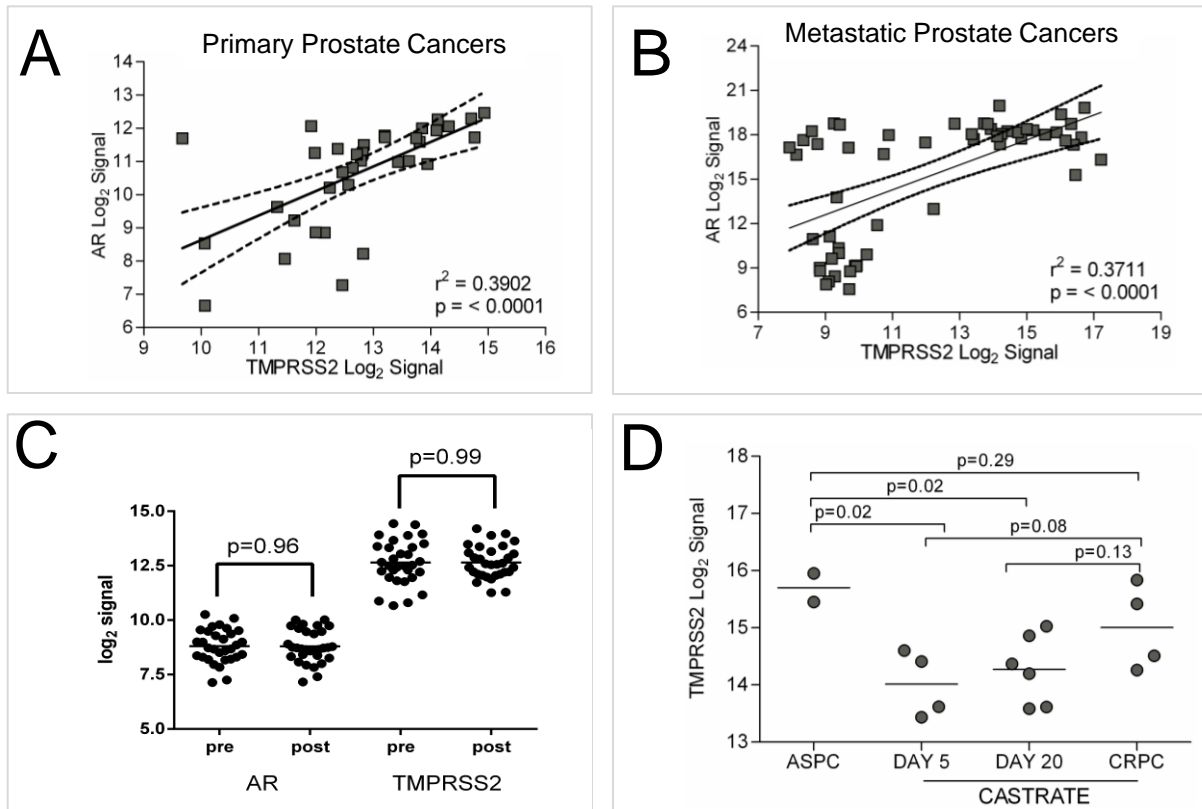

**Supplementary Figure S1. TMPRSS2 expression is associated with androgen receptor (AR) levels and is regulated by androgens *in vivo*.**

- (A) Correlation TMPRSS2 and AR transcript levels determined from the same localized or (B) metastatic tumor sample.
- (C) To evaluate the effect of chemotherapy on the expression of TMPRSS2, we microdissected neoplastic prostate epithelium before (frozen prostate needle biopsies) and after (frozen radical prostatectomy tissue) exposure to 4 cycles of mitoxantrone and docetaxel chemotherapy. A total of 31 subjects were evaluated. Viable tumor cells were present for all subjects before (pre) and after (post) chemotherapy. To allow for accurate comparisons, approximately 2,000 neoplastic tumor cells were dissected from each pre-treatment and post-treatment sample. qRT-PCR was used to quantitate transcripts for TMPRSS2 and AR. There was no difference in the abundance of mRNAs encoding AR or TMPRSS2 pre/post treatment, either by overall groups, or comparing each patient pair.
- (D) TMPRSS2 expression in androgen-sensitive LuCaP35 prostate cancer xenografts (ASPC) is attenuated following castration and increases at the time of castration-resistant tumor re-growth (CRPC).

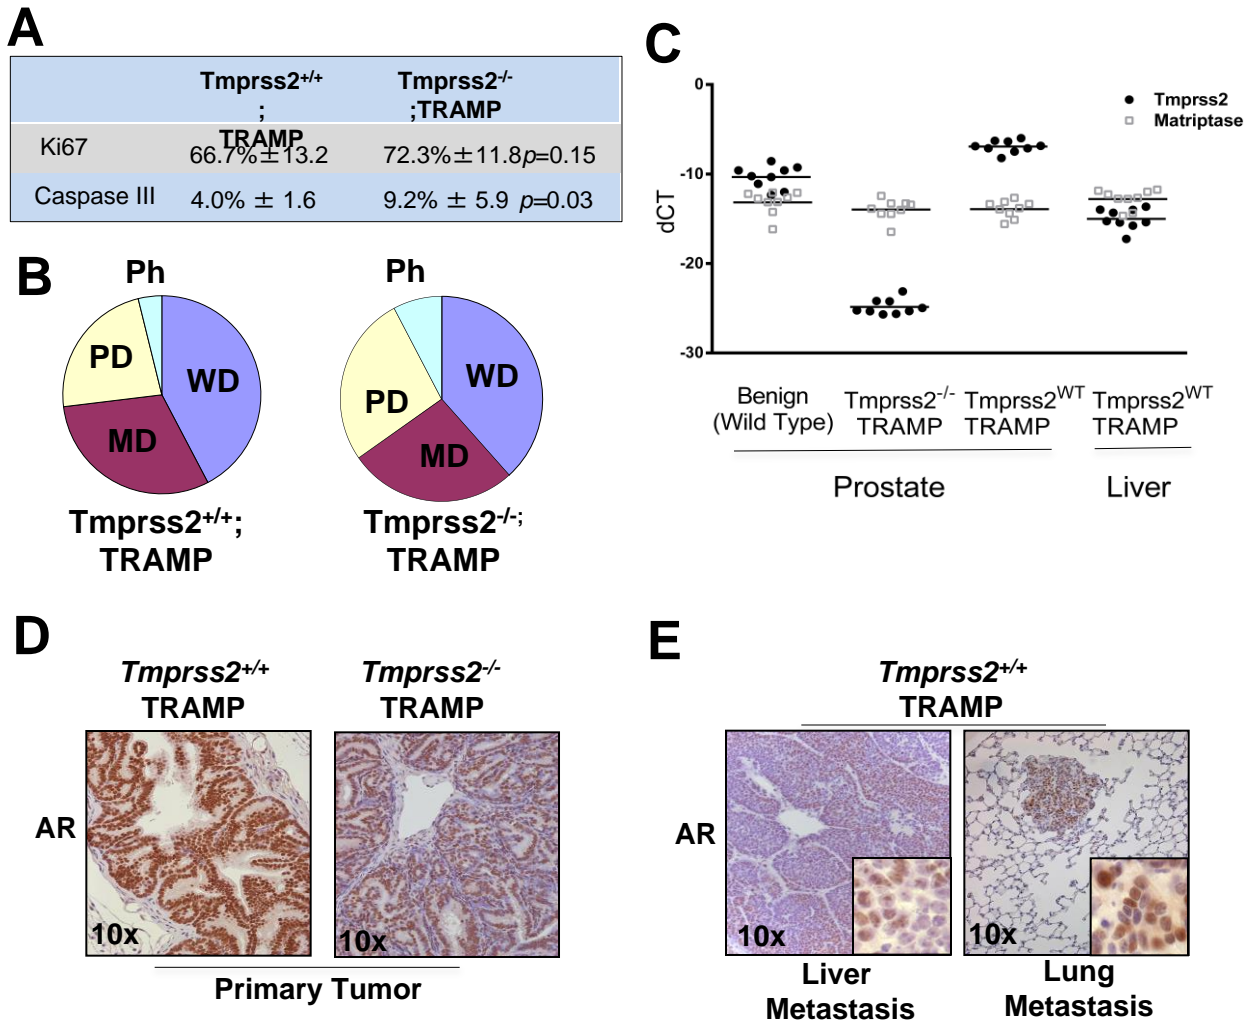

**Supplementary Figure S2. Characterization of the differentiation status, *Tmprss2* and AR expression in *Tmprss2*<sup>+/+</sup> TRAMP and *Tmprss2*<sup>-/-</sup> TRAMP mice.**

(A) Proliferation and apoptosis rates in *Tmprss2*<sup>+/+</sup>;TRAMP (n=16) and *Tmprss2*<sup>-/-</sup>;TRAMP (n=17) tumors determined by Ki67 staining and Caspase III staining, respectively.

(B) *Tmprss2* genotype and the histological differentiation status of prostate tumors in TRAMP mice. WD: well differentiated, MD: moderately differentiated, PD: poorly differentiated and PH: phyllodes like. Poorly differentiated was also characterized by positive staining for the neuroendocrine marker synaptophysin.

(C) *Tmprss2* and Matriptase expression determined by qRT-PCR in benign and neoplastic epithelium in the prostate gland and in metastatic tumor foci resected from liver.

(D) Representative example of immunohistochemical assessment of androgen receptor (AR) protein in the prostate glands of *Tmprss2*<sup>+/+</sup>;TRAMP and *Tmprss2*<sup>-/-</sup>;TRAMP mice. No significant differences in AR staining was observed between genotypes.

(E) Representative example of immunohistochemical assessment of androgen receptor (AR) protein in the liver and lung metastasis from *Tmprss2*<sup>+/+</sup>;TRAMP mice. Tumor cells with and without nuclear AR expression (brown immunoreactivity) were evident.

Lucas, et al  
SUPPLEMENTARY FIGURE S3

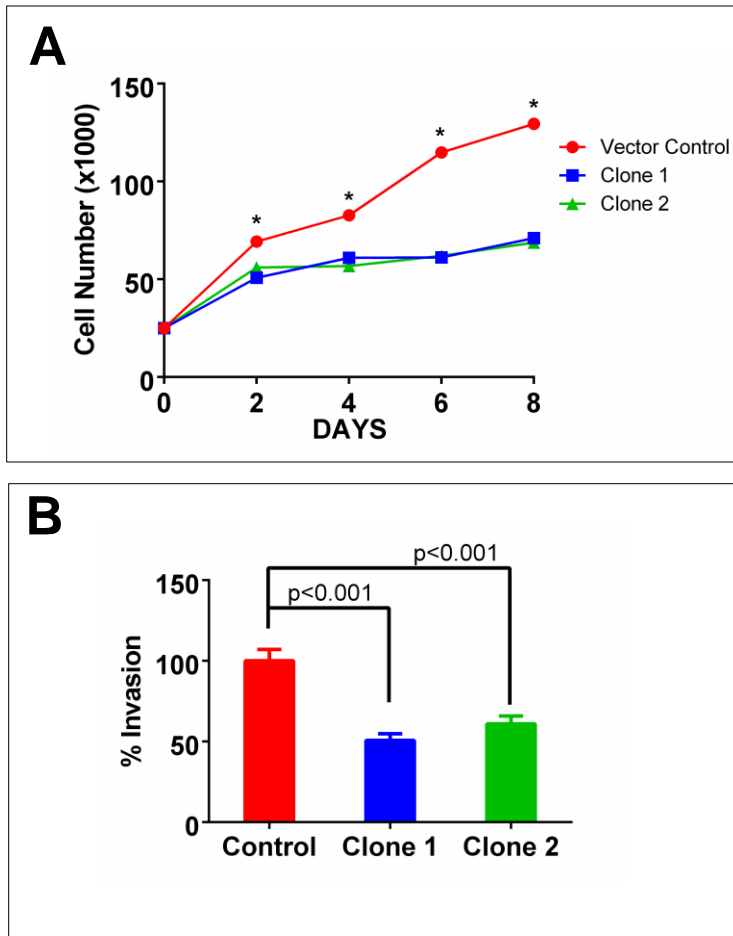

**Supplementary Figure S3. Suppression of TMPRSS2 inhibits cell proliferation and invasion.**

**(A)** Suppression of TMPRSS2 reduces the proliferation of LNCaP C4-2B cells. Two distinct shRNAs targeting the TMPRSS2 transcript and control scrambled shRNAs were introduced into LNCaP C4-2B cells. 20,000 cells were plated and The number of metabolically active cells was measured at 0, 2, 4, 6 and 8 days using the Celltiter 96 Cell Proliferation Assay from Promega (Madison, WI). \* $P < 0.05$  for differences.

**(B)** Suppression of TMPRSS2 reduces the invasion of LNCaP C4-2B cells. Differences were determined by Student's T-test.

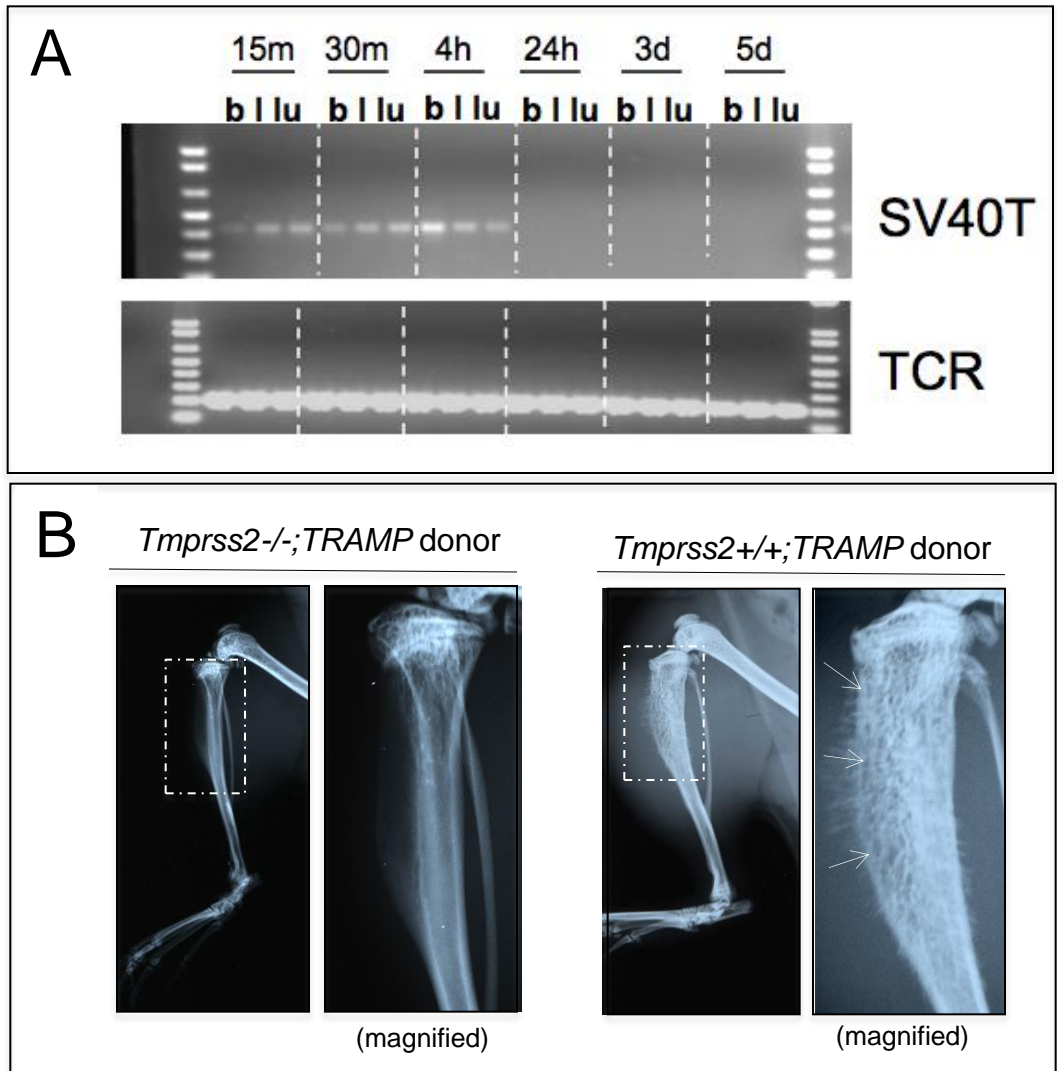

**Supplementary Figure S4. TMPRSS2 influences tumor cell clearance and growth in metastatic sites. (A)** Rapid clearance of non-viable tumor cells following intravenous injection. Tumor cells were dissociated from primary tumors arising in 32 week old *Tmprss2*<sup>+/+</sup>;TRAMP mice, fixed in ethanol, washed, resuspended in PBS, and  $5 \times 10^5$  cells were injected into the tail veins of recipient mice. At the indicated time points, mice were euthanized and DNA was extracted for blood (b), liver (l) and lung (Lu) followed by RT-PCR for SV40T antigen or T cell receptor (TCR) as a positive control. **(B)** Cells derived from *Tmprss2*<sup>-/-</sup>;TRAMP or *Tmprss2*<sup>WT</sup>;TRAMP primary tumors were injected directly into the tibia of recipient hosts. Donor tumors were obtained at 20 or 32-week time points. Recipients were imaged and sacrificed at 8 weeks after intratibial injections and tumor presence was confirmed by histology. Representative radiographs of the xenografted mouse tibia are shown. Arrows denote an expansile bone lesion with mixed osteolytic/osteoblastic characteristics. Histological examination determined that 21 of 32 (66%) recipients of tumor cells derived from 6 different *Tmprss2*<sup>WT</sup>;TRAMP donors had tumors, while 0 of 29 recipients of tumors cells from 8 different *Tmprss2*<sup>-/-</sup>;TRAMP donors had evidence of tumor growth ( $p < 0.001$ )

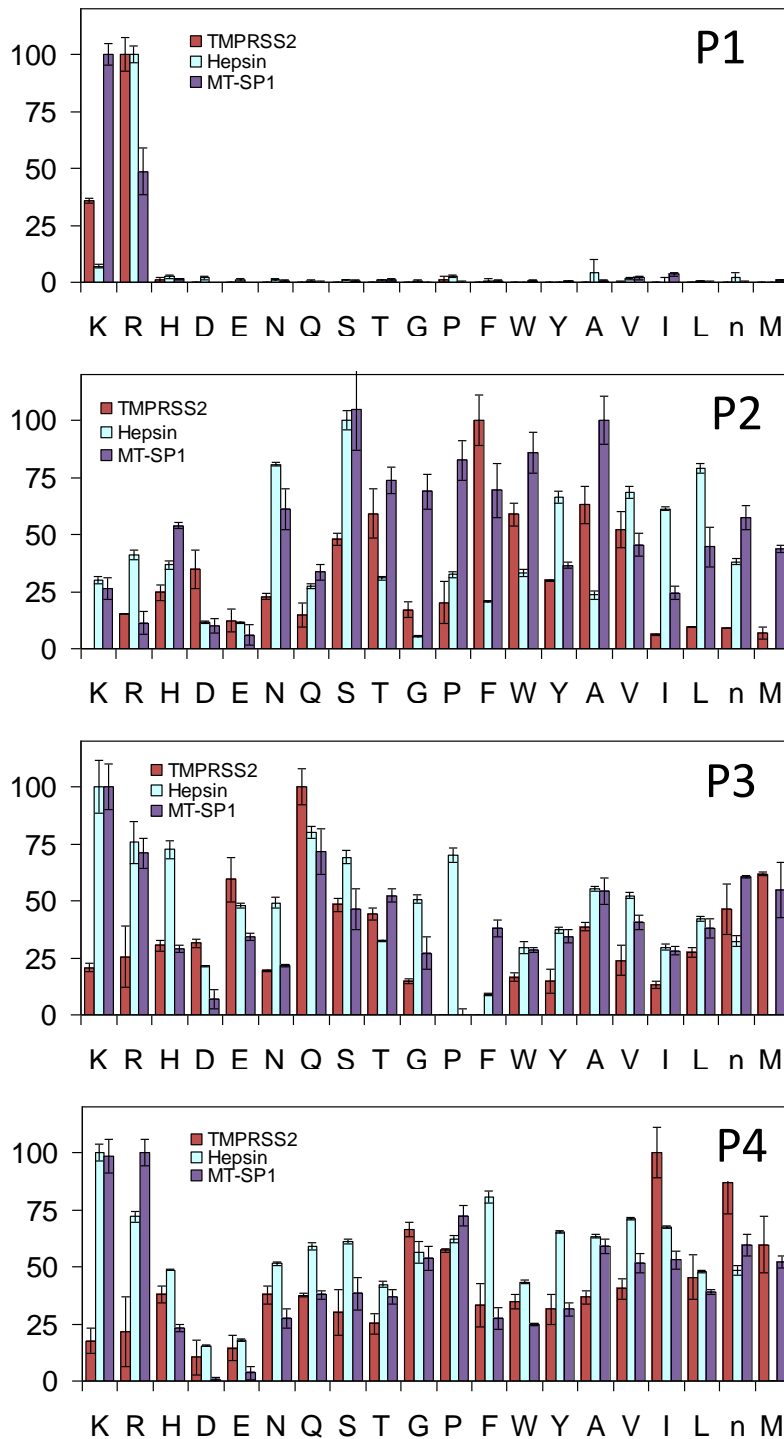

**Supplementary Figure S5. Comparison of cleavage specificities for type II transmembrane serine proteases expressed in prostate epithelium.** Comparative PS-SCL analysis of the extended substrate specificities of TMPRSS2 (Red), Hepsin (blue), and Matriptase (purple) demonstrates diversity in the preferred P2-P4 cleavage site residues.

**Supplementary Figure S6.** Identification of putative TMPRSS2 substrates based on peptide cleavage specificities determined by PS-SCL.

| P4       | P3 | P2 | P1 | P'   | Gene      | Name                                                          | Source  | Accession | Predicted |
|----------|----|----|----|------|-----------|---------------------------------------------------------------|---------|-----------|-----------|
| <b>A</b> |    |    |    |      |           |                                                               |         |           |           |
| G        | E  | T  | R  | IIKG | KLK11     | Kallikrein-related peptidase 11                               | UniProt | Q9UXB7    | GETR      |
| P        | Q  | A  | R  | ITGG | PRSS8     | prostasin [S01.159]                                           | UniProt | Q16651    | PQAR      |
| P        | Q  | F  | R  | IKGG | PLAT      | t-plasminogen activator [S01.232]                             | UniProt | P00750    | PQFR      |
| <b>B</b> |    |    |    |      |           |                                                               |         |           |           |
| P        | Q  | G  | R  | IVGG | F7        | coagulation factor VIIa [S01.215]                             | UniProt | P08709    | PQGR      |
| P        | S  | A  | R  | IVGG |           | polyserase-2 unit 1 [S01.414]                                 | ProtID  | CAF25303  | PSAR      |
| S        | M  | T  | R  | VVGG | F12       | coagulation factor XIIa [S01.211]                             | UniProt | P00748    | SMTR      |
| R        | Q  | A  | R  | VVGG | ST14      | matriptase [S01.302]                                          | UniProt | Q9Y5Y6    | RQAR      |
| G        | G  | V  | R  | IVGG | ACR       | acrosin [S01.223]                                             | UniProt | P10323    | GGVR      |
| L        | M  | A  | R  | IFNG | MASP1     | mannan-binding lectin-associated serine peptidase 1 [S01.198] | UniProt | P48740    | LMAR      |
| I        | Q  | S  | R  | IVGG | KLK2      | kallikrein-related peptidase 2 [S01.161]                      | UniProt | P20151    | IQSR      |
| I        | Q  | S  | R  | IVGG | KLK1      | kallikrein 1 [S01.160]                                        | UniProt | P06870    | IQSR      |
| <b>C</b> |    |    |    |      |           |                                                               |         |           |           |
| I        | K  | P  | R  | IVGG | F11       | coagulation factor XIa [S01.213]                              | UniProt | P03951    | IKPR      |
| N        | L  | T  | R  | IVGG | F10       | coagulation factor Xa [S01.216]                               | UniProt | P00742    | NLTR      |
| D        | F  | T  | R  | VVGG | F9        | coagulation factor IXa [S01.214]                              | UniProt | P00740    | DFTR      |
| I        | F  | S  | R  | ILGG |           | ovo-chymase-2 [S01.320]                                       | ProtID  | XP_089945 | IFSR      |
| S        | G  | T  | R  | IAEG |           | secreted trypsin-like serine peptidase homologue [S01.957]    | MEROPS  | NA        | SGTR      |
| P        | R  | G  | R  | ILGG | CFD       | complement factor D [S01.191]                                 | UniProt | P00746    | PRGR      |
| R        | Q  | K  | R  | IIGG | PRSS12    | neurotrypsin [S01.237]                                        | UniProt | P56730    | RQKR      |
| I        | D  | G  | R  | IVEG | F2        | thrombin [S01.217]                                            | UniProt | P00734    | IDGR      |
| R        | Q  | S  | R  | IVGG | TMPRSS2   | epitheliasin [S01.247]                                        | UniProt | O15393    | RQSR      |
| S        | E  | Q  | R  | ILGG | TMPRSS11D | adrenal secretory serine peptidase [S01.047]                  | UniProt | O60235    | SEQR      |
| T        | N  | A  | R  | VVGG | ELA1      | elastase-1 [S01.153]                                          | UniProt | Q9UNI1    | TNAR      |
| A        | L  | T  | R  | IVGG | TMPRSS9   | polyserase-1A unit 3 [S01.969]                                | UniProt | Q7Z410    | ALTR      |
| P        | S  | S  | R  | IVGG | TMPRSS6   | matriptase-2 [S01.308]                                        | UniProt | Q8IU80    | PSSR      |
| I        | L  | S  | R  | IVGG | KLK3      | kallikrein-related peptidase 3 [S01.162]                      | UniProt | P07288    | ILSR      |
| M        | S  | S  | R  | IVGG | PRSS33    | tryptase-6 [S01.075]                                          | UniProt | Q8NF86    | MSSR      |
| K        | P  | T  | R  | VVGG | TMPRSS9   | polyserase-1A unit 2 [S01.358]                                | UniProt | Q7Z410    | KPTR      |
| P        | V  | D  | R  | IVGG | HPN       | hepsin [S01.224]                                              | UniProt | P05981    | PVDR      |
| P        | S  | S  | R  | VVNG | ELA3B     | pancreatic endopeptidase E form B [S01.205]                   | UniProt | P08861    | PSSR      |
| M        | A  | G  | R  | IVGG | TMPRSS9   | polyserase-1A unit 1 [S01.357]                                | UniProt | Q7Z410    | MAGR      |
| M        | N  | K  | R  | ILGG | CORIN     | corin [S01.019]                                               | UniProt | Q9Y5Q5    | MNKR      |
| L        | S  | A  | R  | VVGG | CTRC      | chymotrypsin C [S01.157]                                      | UniProt | Q99895    | LSAR      |
| G        | L  | S  | R  | IVNG | CTRB2     | chymotrypsin B [S01.152]                                      | UniProt | Q6GP11    | GLSR      |
| P        | V  | Q  | R  | ILGG | HP        | haptoglobin-1 [S01.972]                                       | UniProt | P00738    | PVQR      |
| I        | T  | S  | R  | IVGG | PRSS21    | testisin [S01.011]                                            | UniProt | Q9Y6M0    | ITSR      |
| T        | S  | T  | R  | IVGG | KLKB1     | plasma kallikrein [S01.212]                                   | UniProt | P03952    | TSTR      |
| M        | T  | G  | R  | IVGG | TMPRSS13  | TMPRSS13 peptidase [S01.087]                                  | UniProt | Q9BYE2    | MTGR      |
| Y        | V  | T  | R  | VVGG | ELA2A     | pancreatic elastase II [S01.155]                              | UniProt | P08217    | YVTR      |

Lucas, et al  
**SUPPLEMENTARY FIGURE S7**

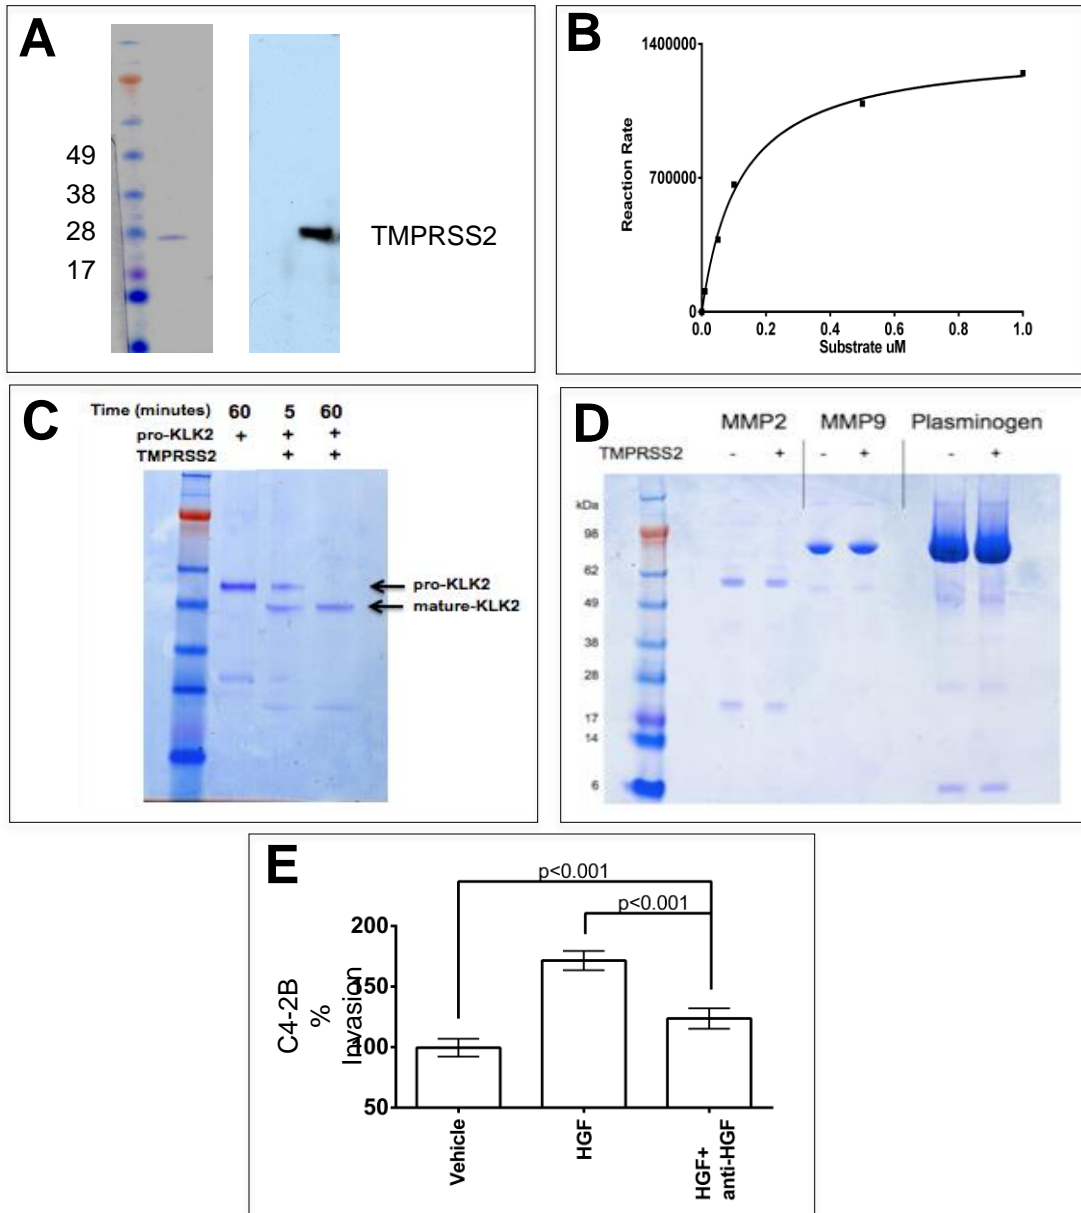

**Supplementary Figure S7. Assessment of TMPRSS2 substrate activity.**

- (A)** Coomassie blue stained SDS-page gel of recombinant human TMPRSS2 expressed in *Pichia pastoris*. Immunoblot using a monoclonal antibody raised against the protease domain of TMPRSS2.
- (B)** TMPRSS2 activity against multiple concentrations of the fluorogenic substrate Boc-GLN-ALA-ARG-Mec. Apparent  $K_m = 0.1191 \mu\text{M}$ . Inhibition of TMPRSS2 by identified compounds. Data shown is the mean of three independent assays. The  $IC_{50}$  was determined using nonlinear regression analysis.
- (C)** The prostate serine protease KLK2 is a TMPRSS2 substrate. Recombinant active TMPRSS2 is able to proteolyze pro-KLK2 to mature active KLK2. Lane 1: pro-KLK2-GST. Lane 2: pro-KLK2-GST + TMPRSS2, 5 minutes. Lane 3: pro-KLK2-GST + TMPRSS2, 60 minutes.
- (D)** TMPRSS2 does not proteolyze MMP2, MMP9 or Plasminogen. Each substrate was incubated with TMPRSS2 for 60 minutes.
- (E)** Exposure of C4-2B cells natively expressing TMPRSS2 to HGF increases invasion compared to vehicle treated cells ( $p < 0.001$ ). The pro-invasive effect is abolished with concurrent treatment with HGF neutralizing antibody ( $p < 0.001$ ).

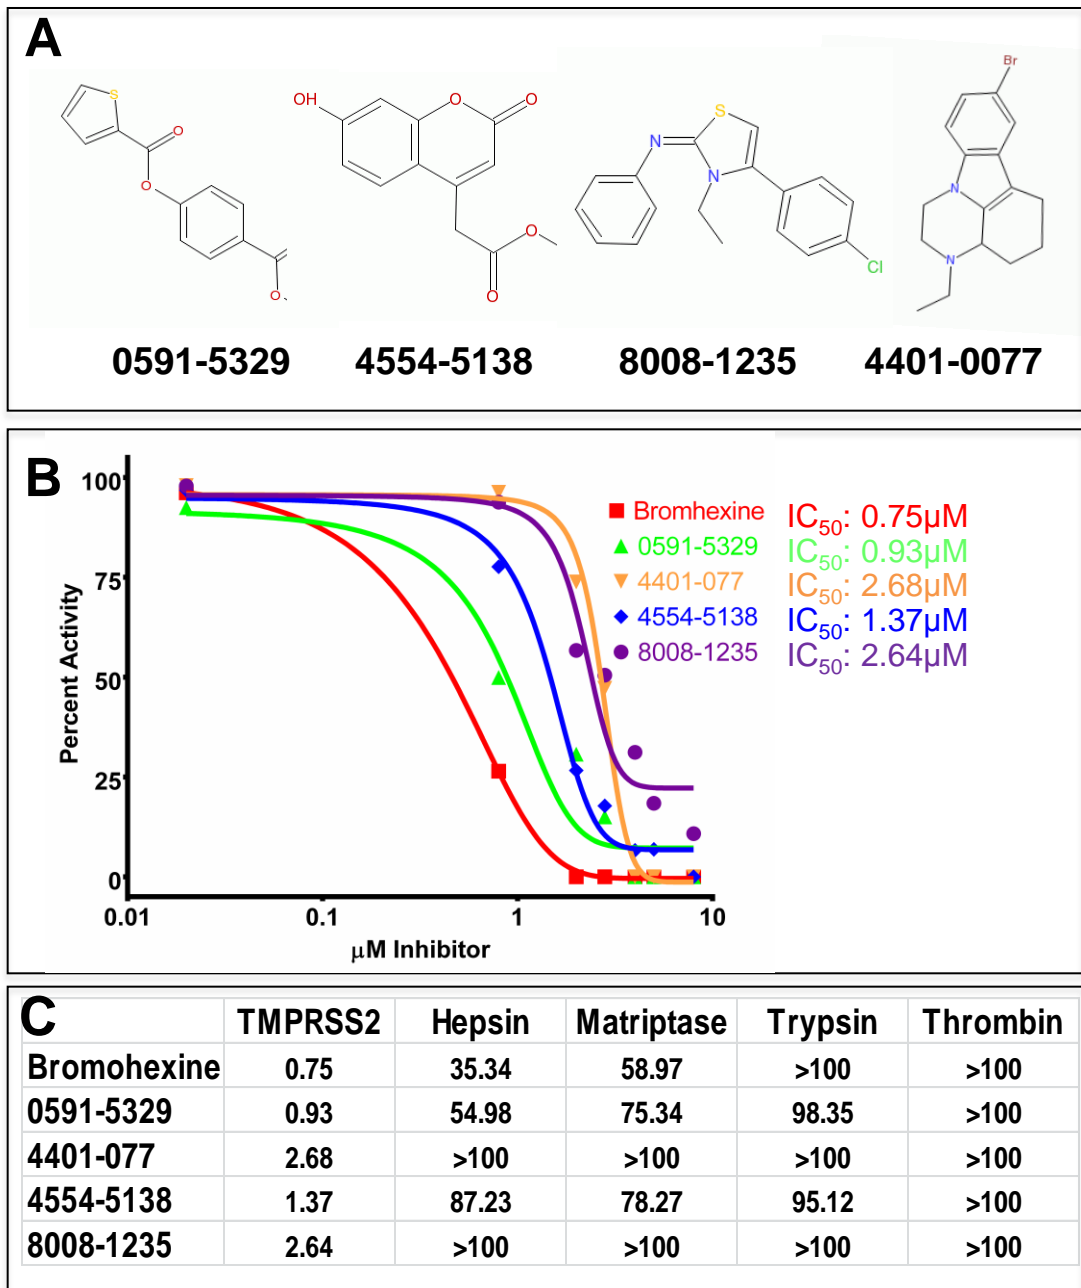

### Supplementary Figure S8. Characterization of TMRSS2 chemical inhibitors.

(A) Chemical structures of the TMRSS2 inhibitors identified by screening compound libraries.

(B) Inhibition of TMRSS2 activity by the identified compounds. Purified recombinant TMRSS2 was preincubated with indicated compounds for 30 min at room temperature. The residual percent activity of the enzyme toward the chromogenic substrate was then determined using a kinetic microplate reader at 405 nm. Data are the mean of three independent experiments.  $IC_{50}$  was calculated by four-variable nonlinear regression curve fitting.

(C)  $IC_{50}$  values in  $\mu$ M for each compound identified in the TMRSS2 inhibitor screen toward 5 serine proteases.



Lucas, et al  
 SUPPLEMENTARY FIGURE S9

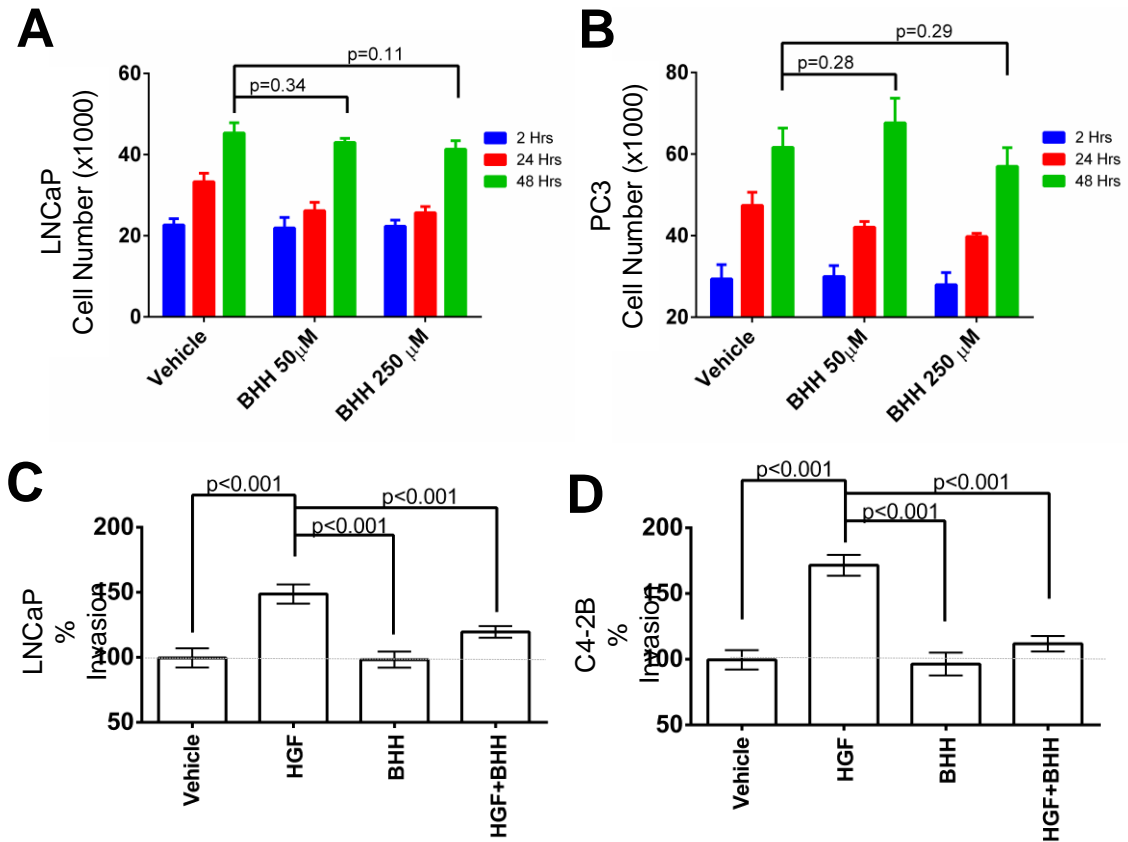

**Supplementary Figure S9. Bromhexine suppresses prostate cancer cell invasion but does not influence proliferation *in vitro*.**

Effects of bromhexine (BHH) on LNCaP (**A**) and PC3 (**B**) cell viability. Cell lines were plated at a density of 2000 cells/well in a 96-well tissue culture plate in replicates of 8. Cells were treated with vehicle or the indicated concentration of BHH. The number of metabolically active cells was measured at 2, 24, and 48 hours using the Celltiter 96 Cell Proliferation Assay from Promega (Madison, WI).

Effects of bromhexine (BHH) on LNCaP (**C**) and C4-2B (**D**) invasion. 50,000 cells were plated with serum free media into the upper matrigel coated invasion chamber and allowed to invade for 24 hours toward the lower chamber which contained serum-free media with vehicle, 50 ng of sc-HGF, and/or 250  $\mu$ M BHH. Invaded cells were detached, lysed, stained and counted in a fluorescence plate reader.
